# Supplementary material
Source: MDPI journal article supplement (https://www.mdpi.com/2073-4433/11/8/856)
Supplement: s1 [file s1]

## Supplementary Materials:

# Accurate, Low Cost PM<sub>2.5</sub> Measurements Demonstrate the Large Spatial Variation in Wood Smoke Pollution in Regional Australia and Improve Modeling and Estimates of Health Costs

Dorothy L Robinson

Adjunct Senior Research Fellow, University of New England, Armidale, NSW 2351, Australia;  
drd.robinson@gmail.com

Received: 14 July 2020; Accepted: 8 August; Published: date

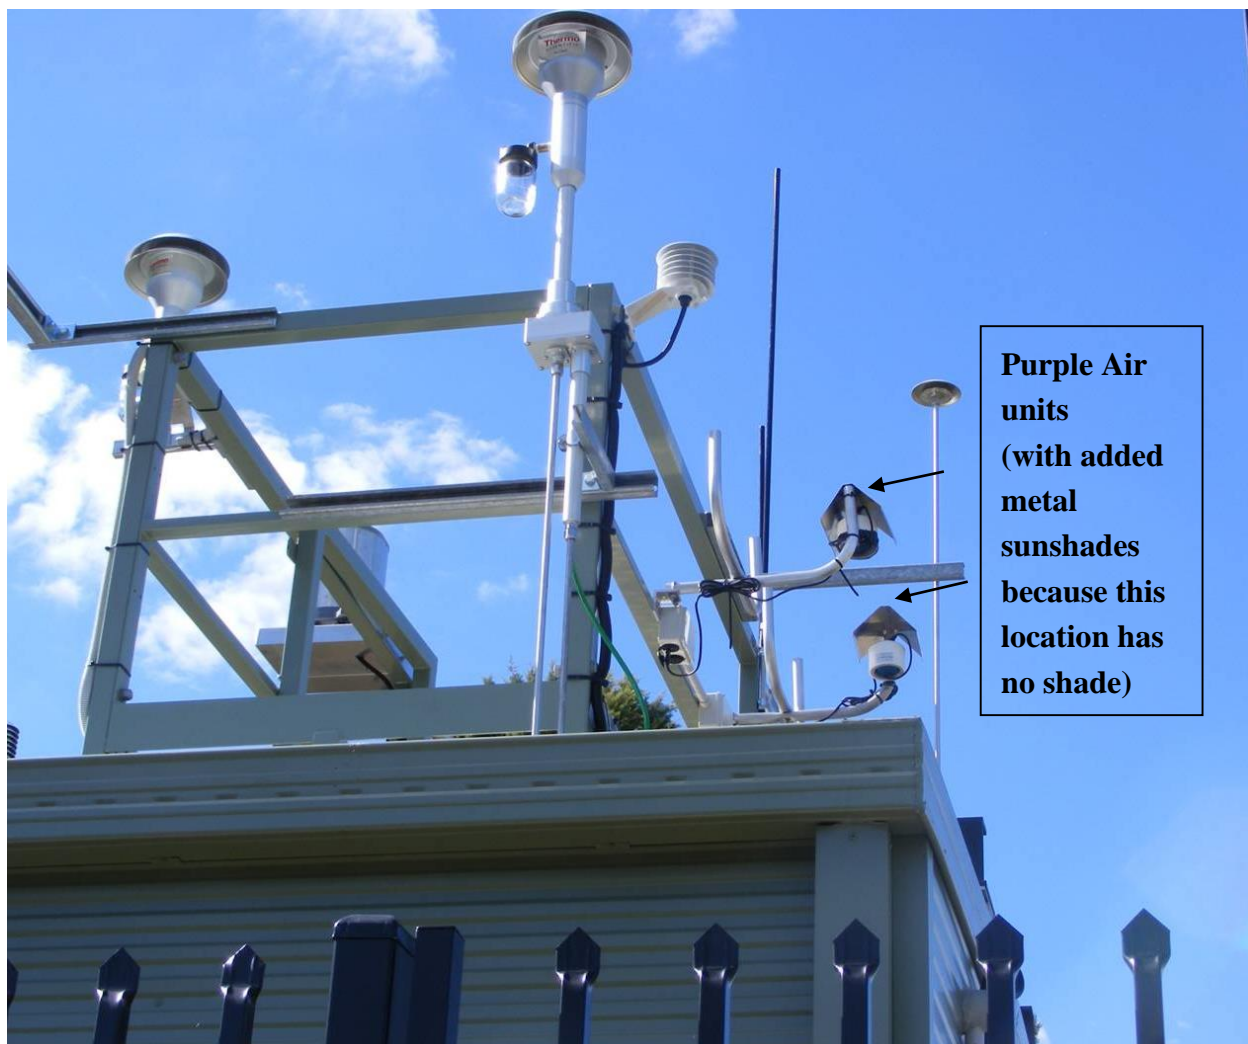

**Figure S1.** Two Purple Air Monitors installed on the roof of the NSW Government Station.

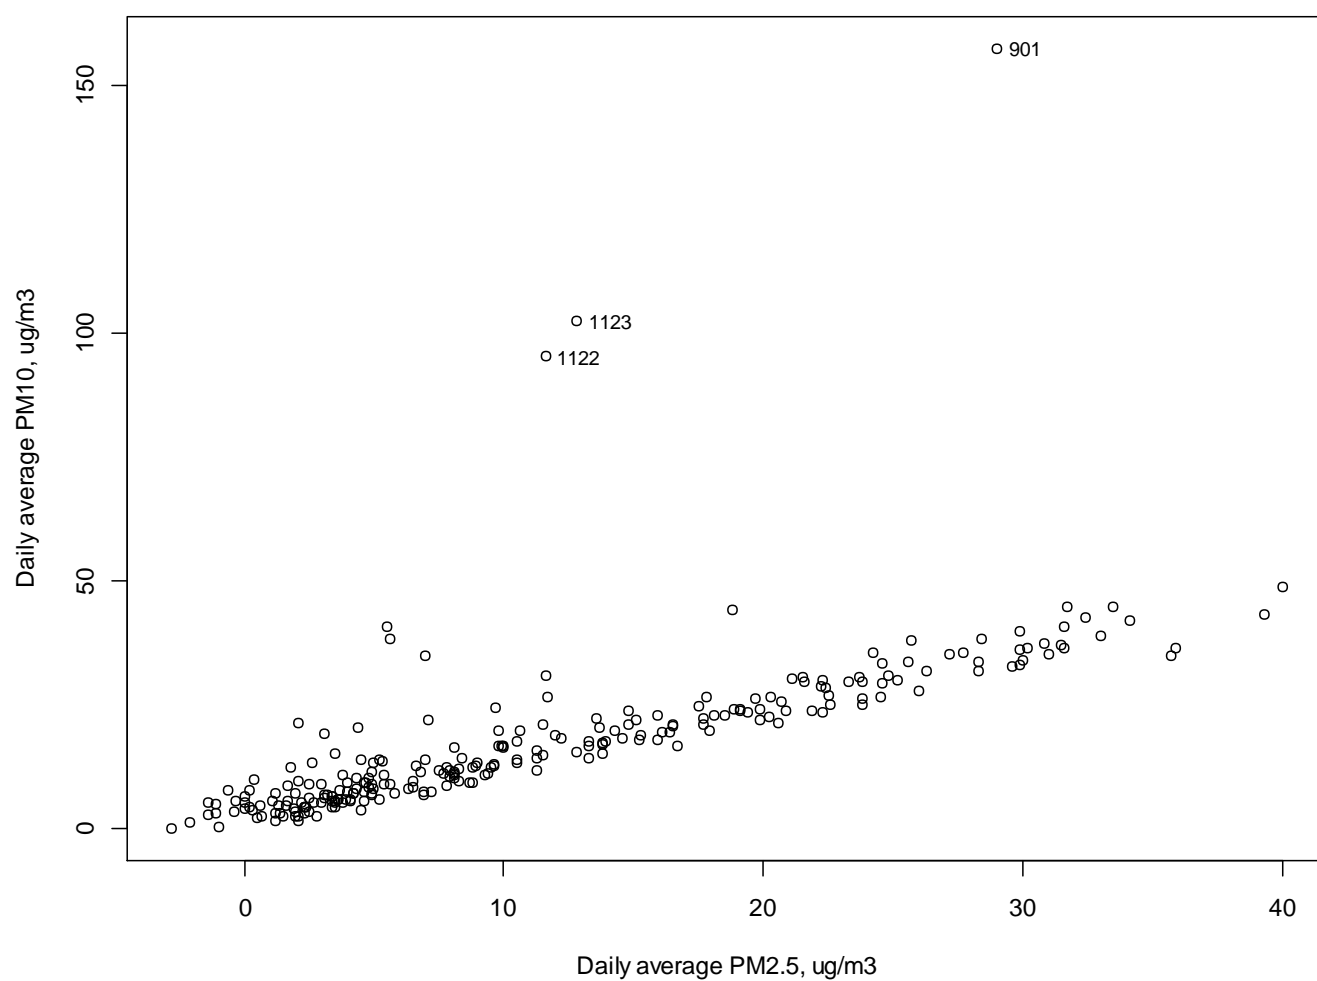

**Figure S2.** Comparison of daily average PM<sub>10</sub> and PM<sub>2.5</sub> at the Armidale NSW Government Station, including dates (month and day in 2018) when major dust storms were reported. .

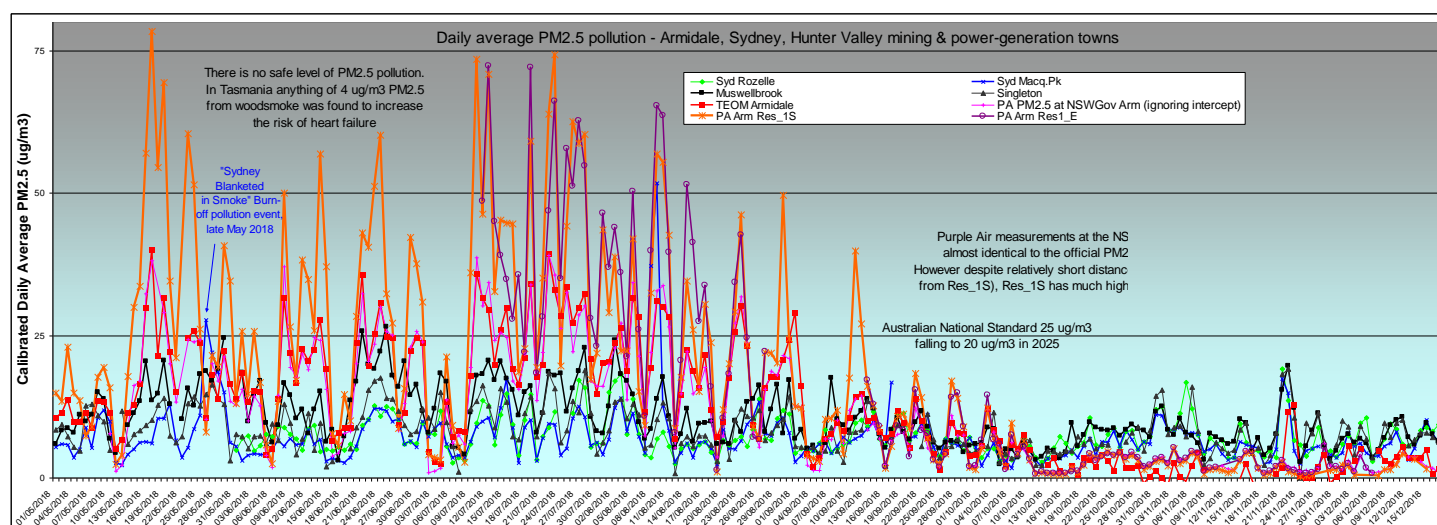

**Figure S3.** Daily Average PM<sub>2.5</sub> measurements at NSW Government air pollution stations in Sydney (Rozelle, Macquarie Park), Muswellbrook, Singleton (two Hunter Valley mining and power-generation towns) and Armidale, together with Purple Air PM<sub>2.5</sub> measurements at the NSW Government station and two residential areas in Armidale.
